# Supplementary material
Source: PubMed Central journal article supplement (PMC7290397)
Supplement: jamaoncol-6-856-s003.pdf [file jamaoncol-6-856-s003.pdf]

## **Data Sharing Statement**

Arrieta. Efficacy and Safety of Pembrolizumab Plus Docetaxel vs Docetaxel Alone in Patients With Previously Treated Advanced Non-Small Cell Lung Cancer. *JAMA Oncol*. Published April 09, 2020. 10.1001/jamaoncol.2020.0409

### **Data**

**Data available:** No
